# Supplementary material
Source: PubMed Central journal article supplement (PMC3826540)

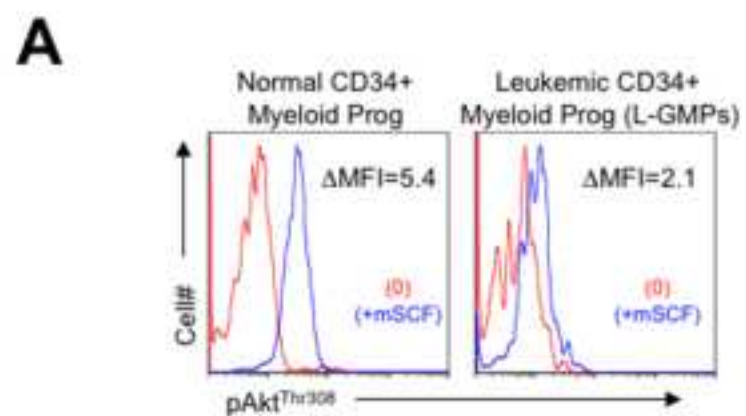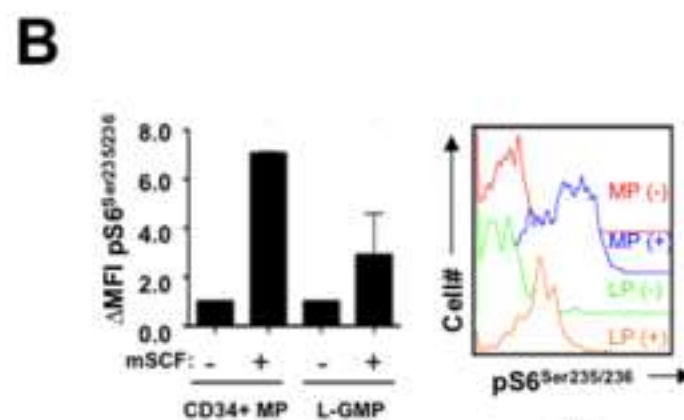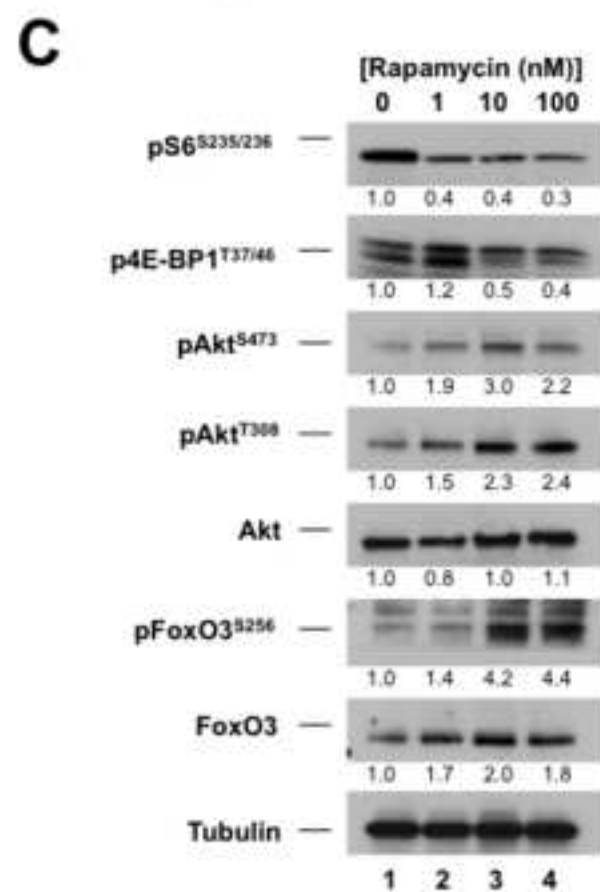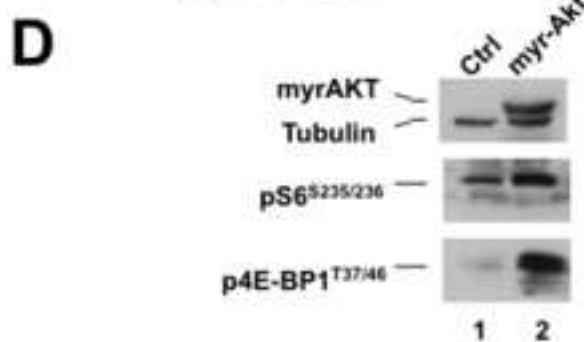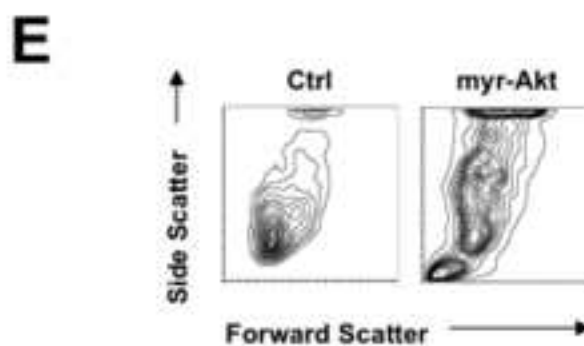

Figure S2

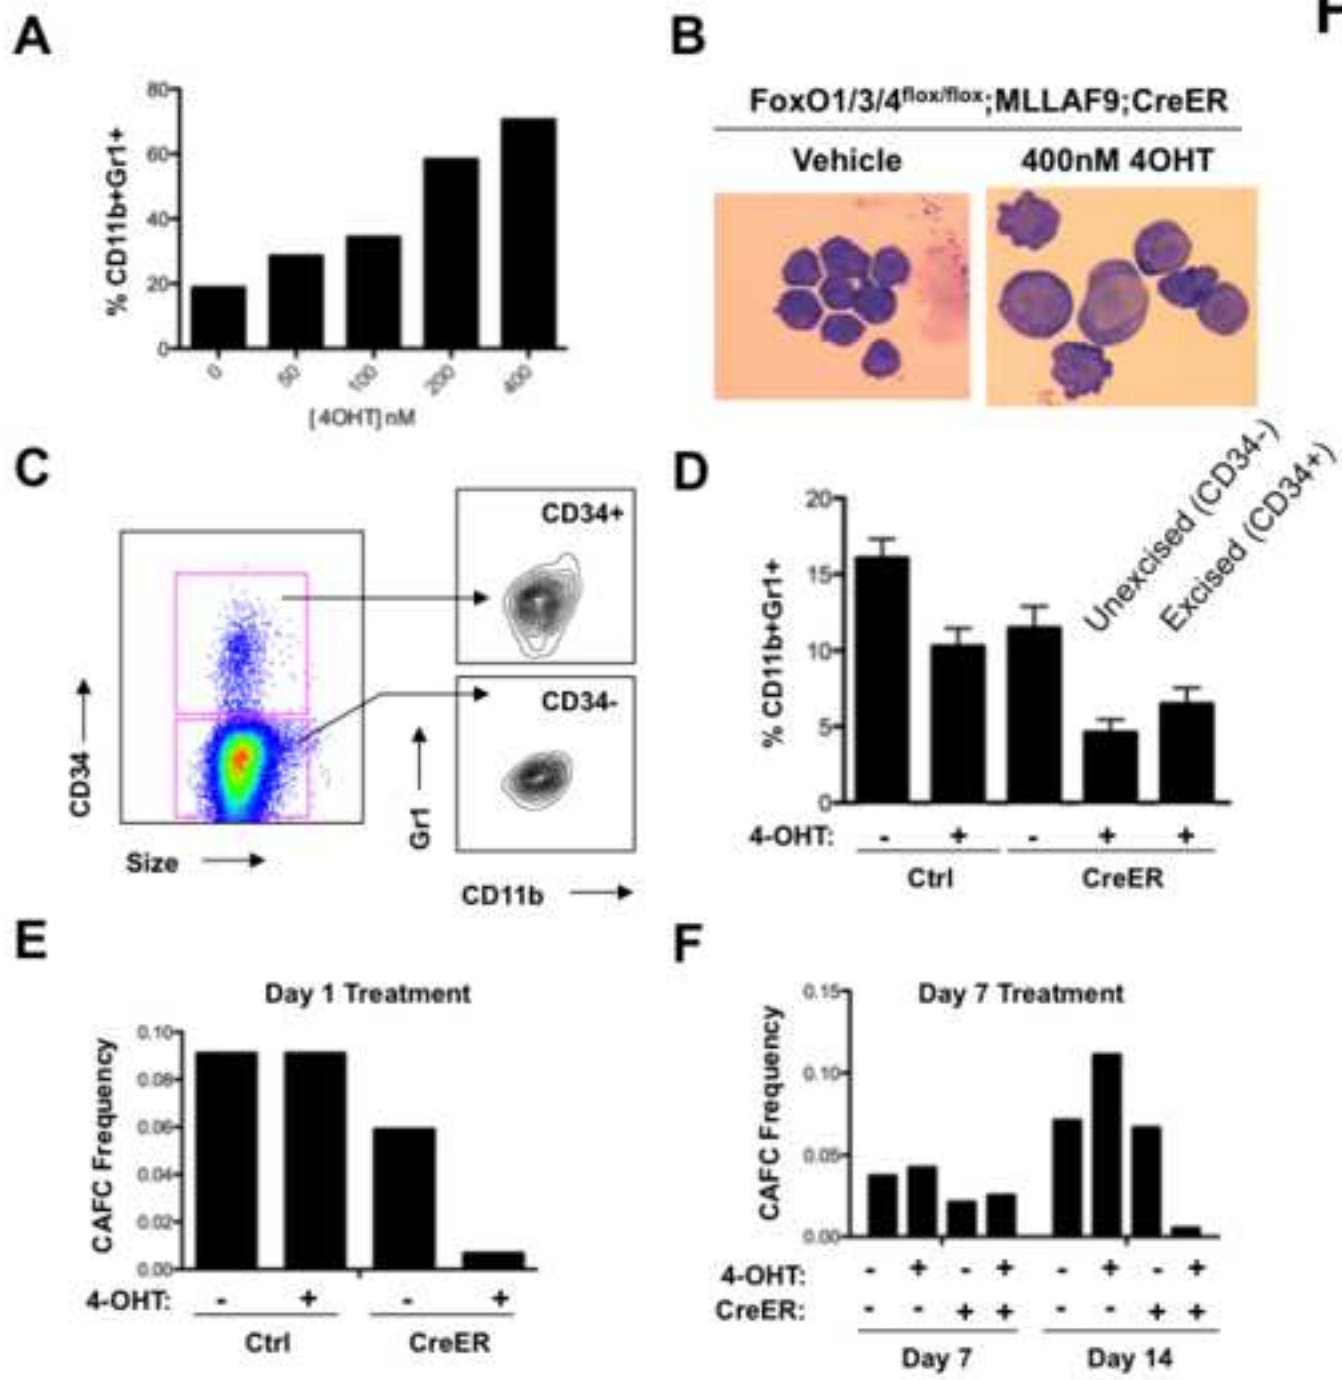

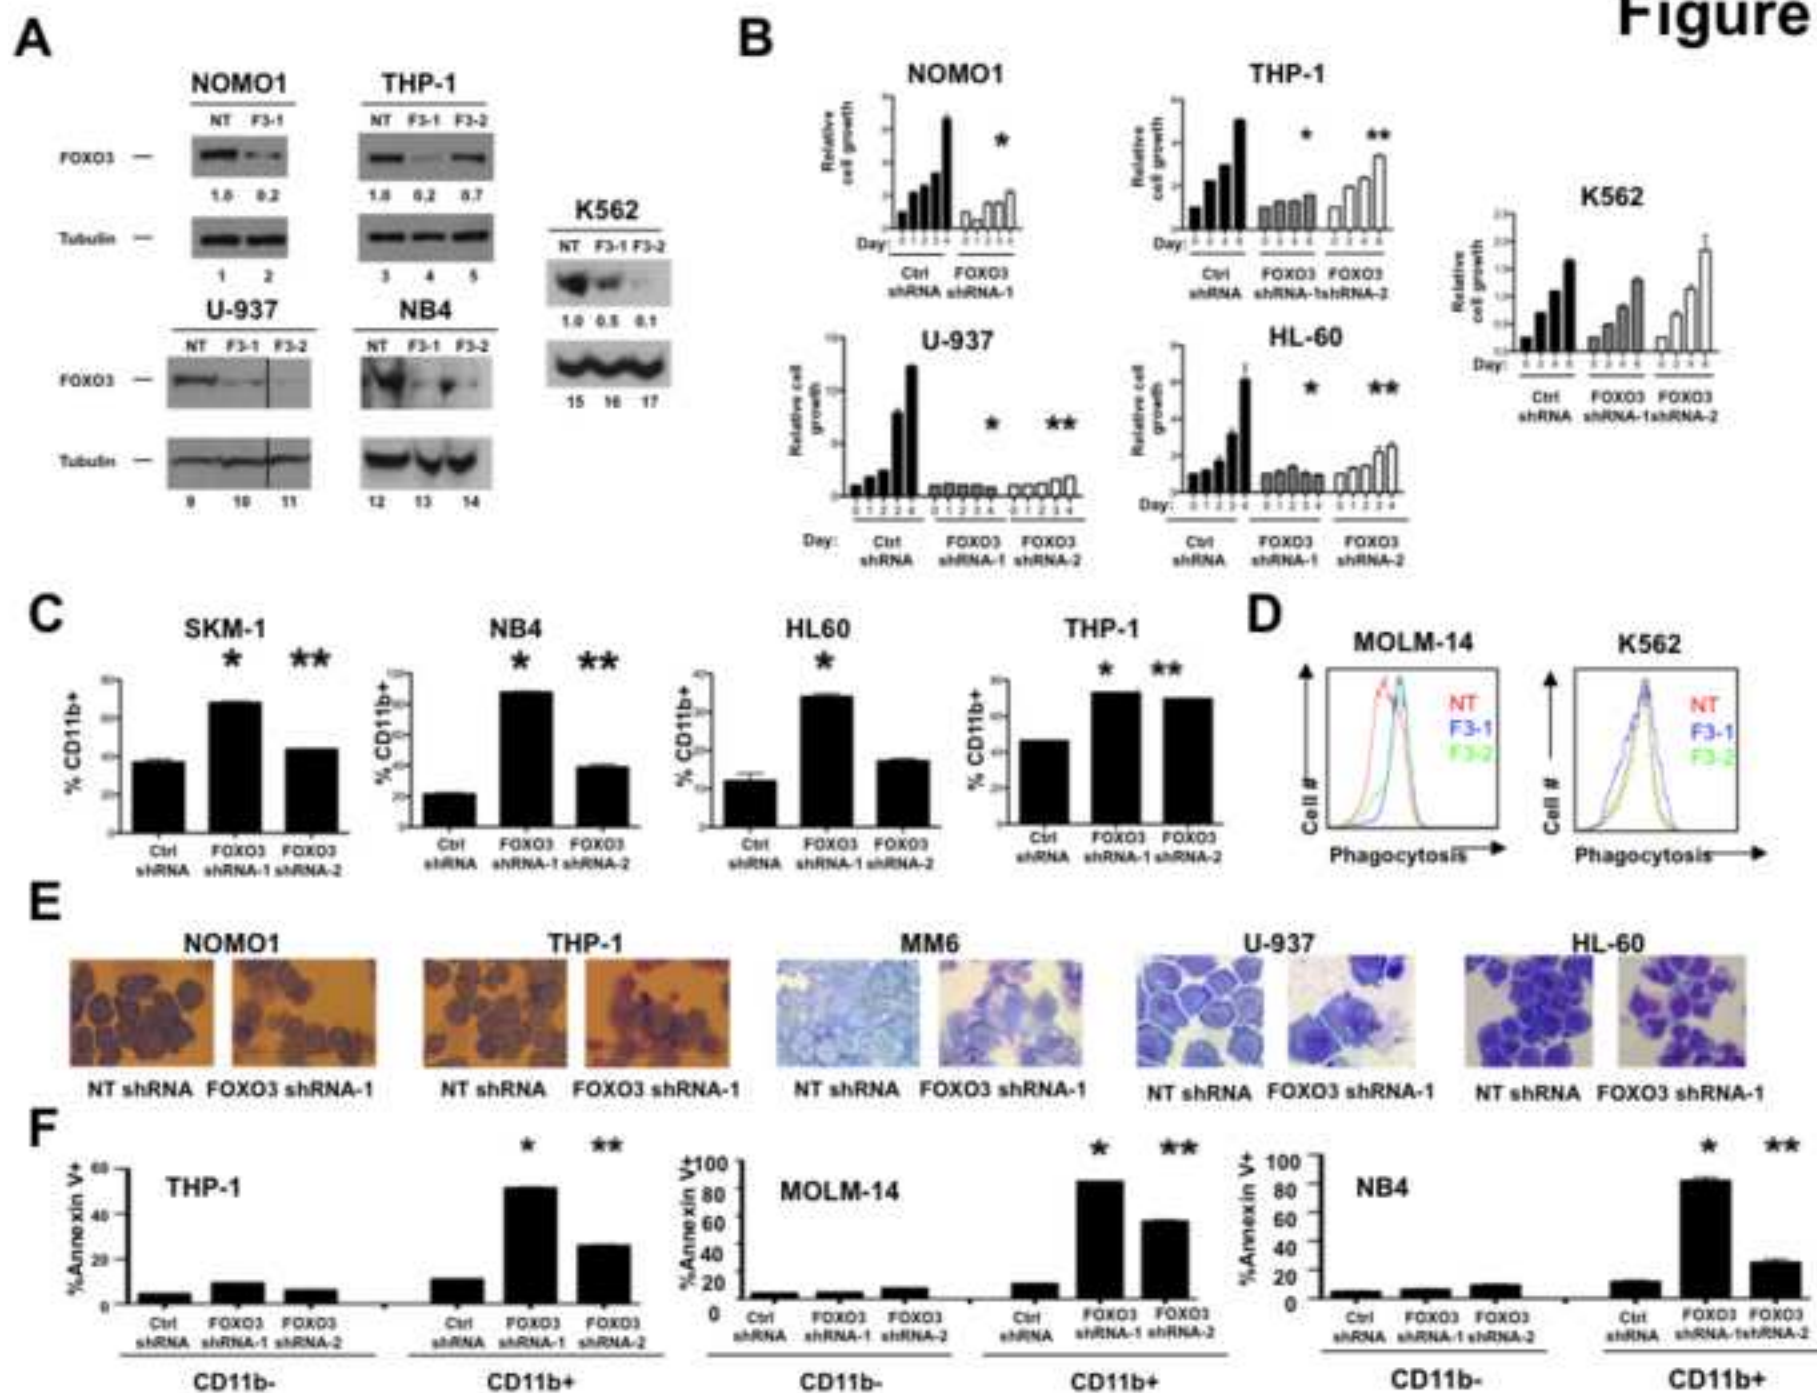

**A**

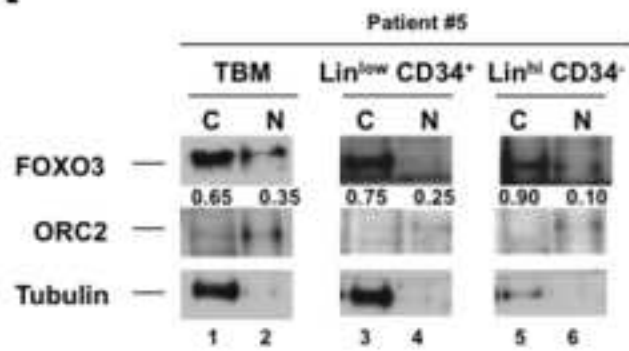

**B**

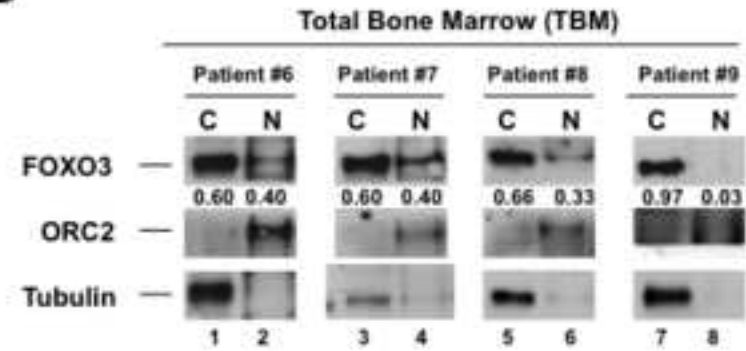

**C**

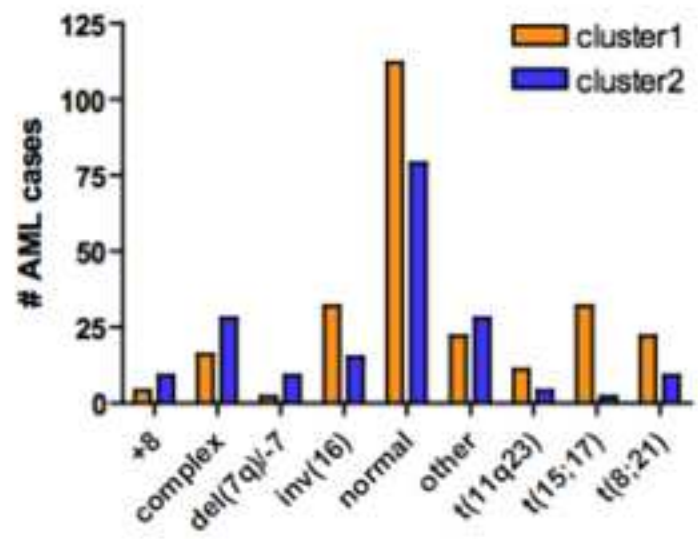

**D**

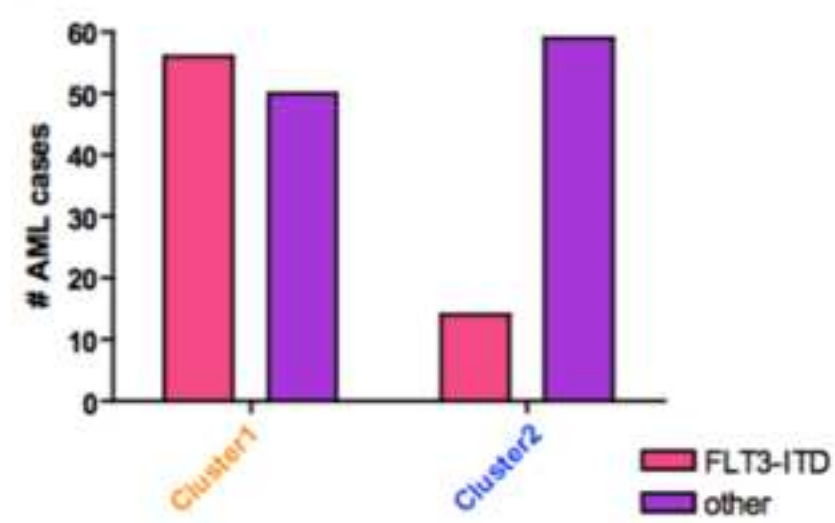

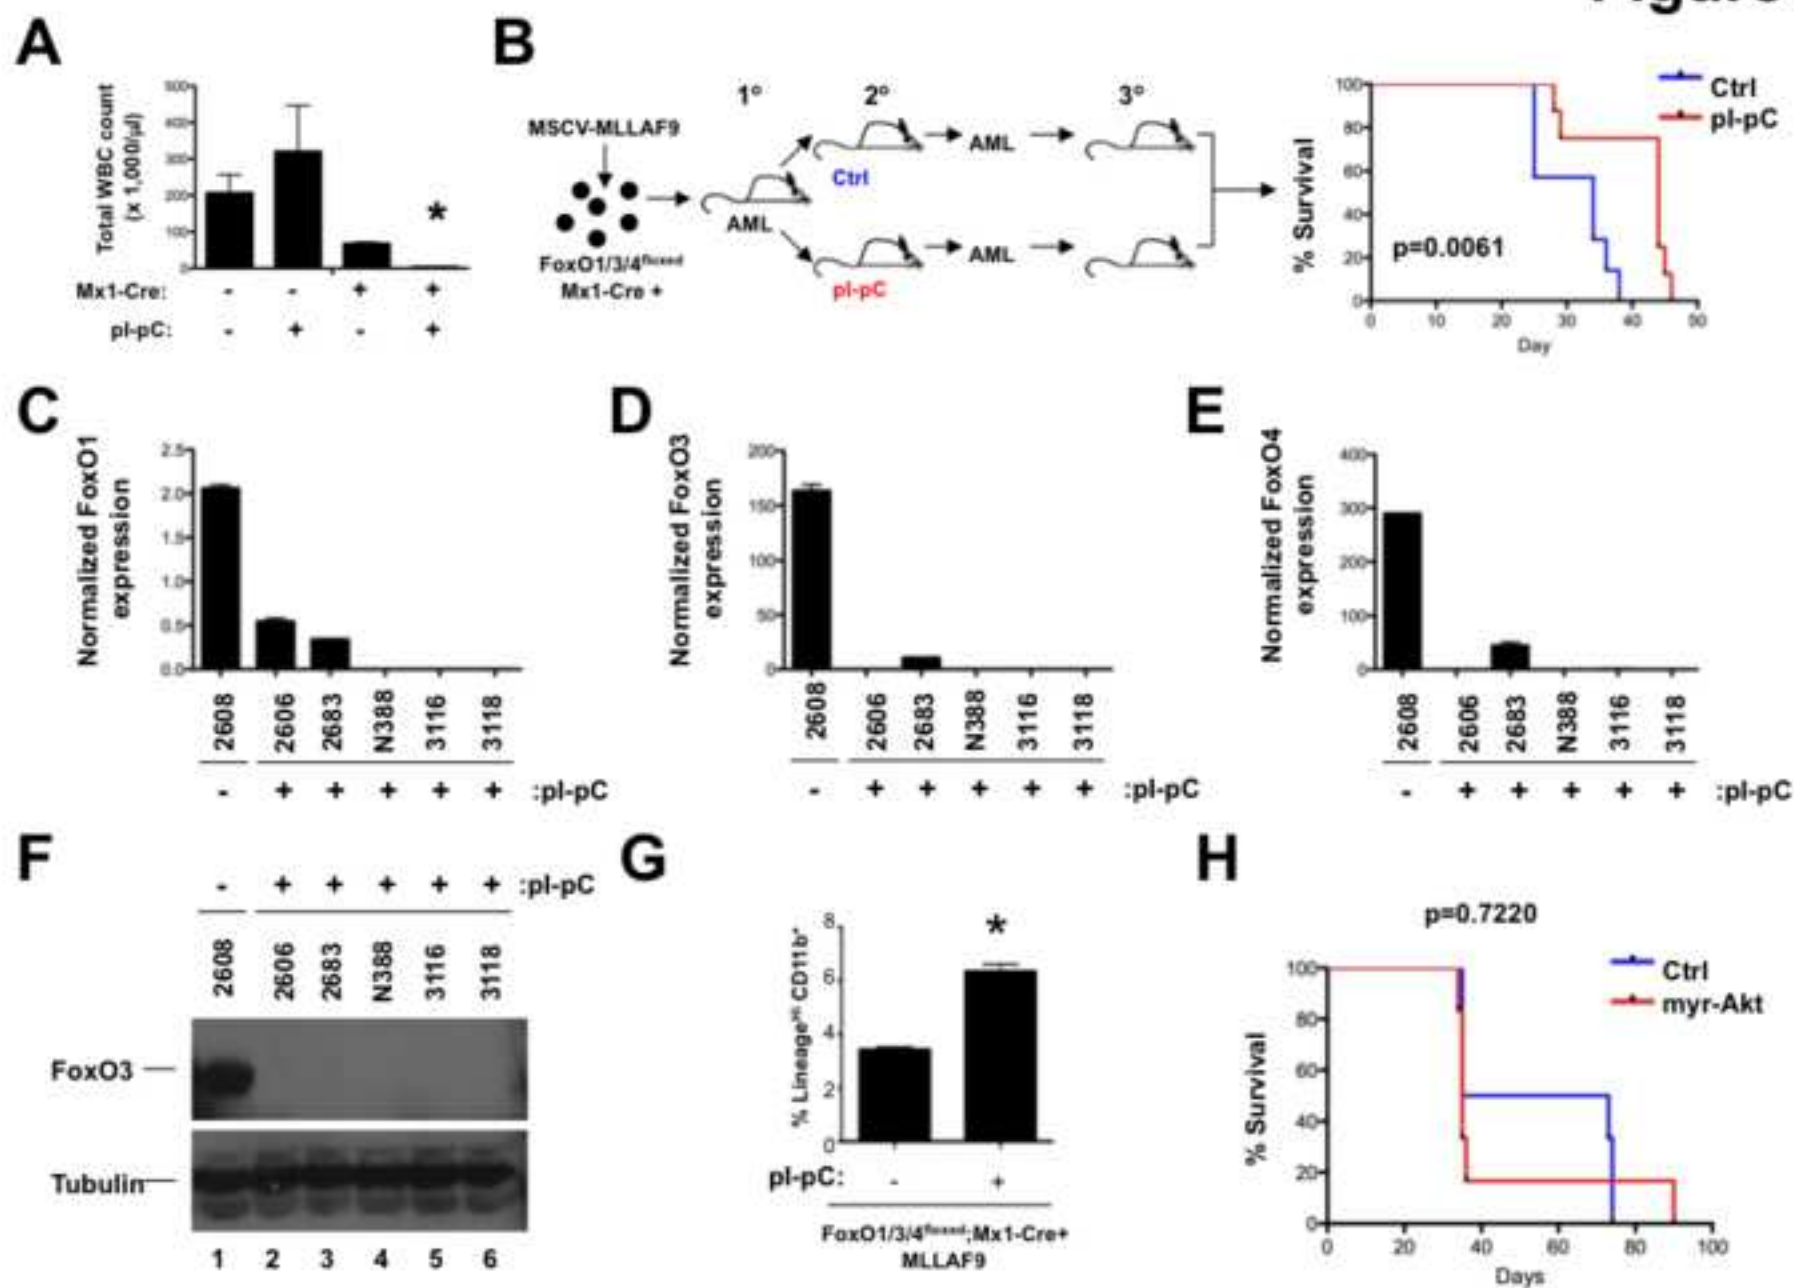

Figure S6

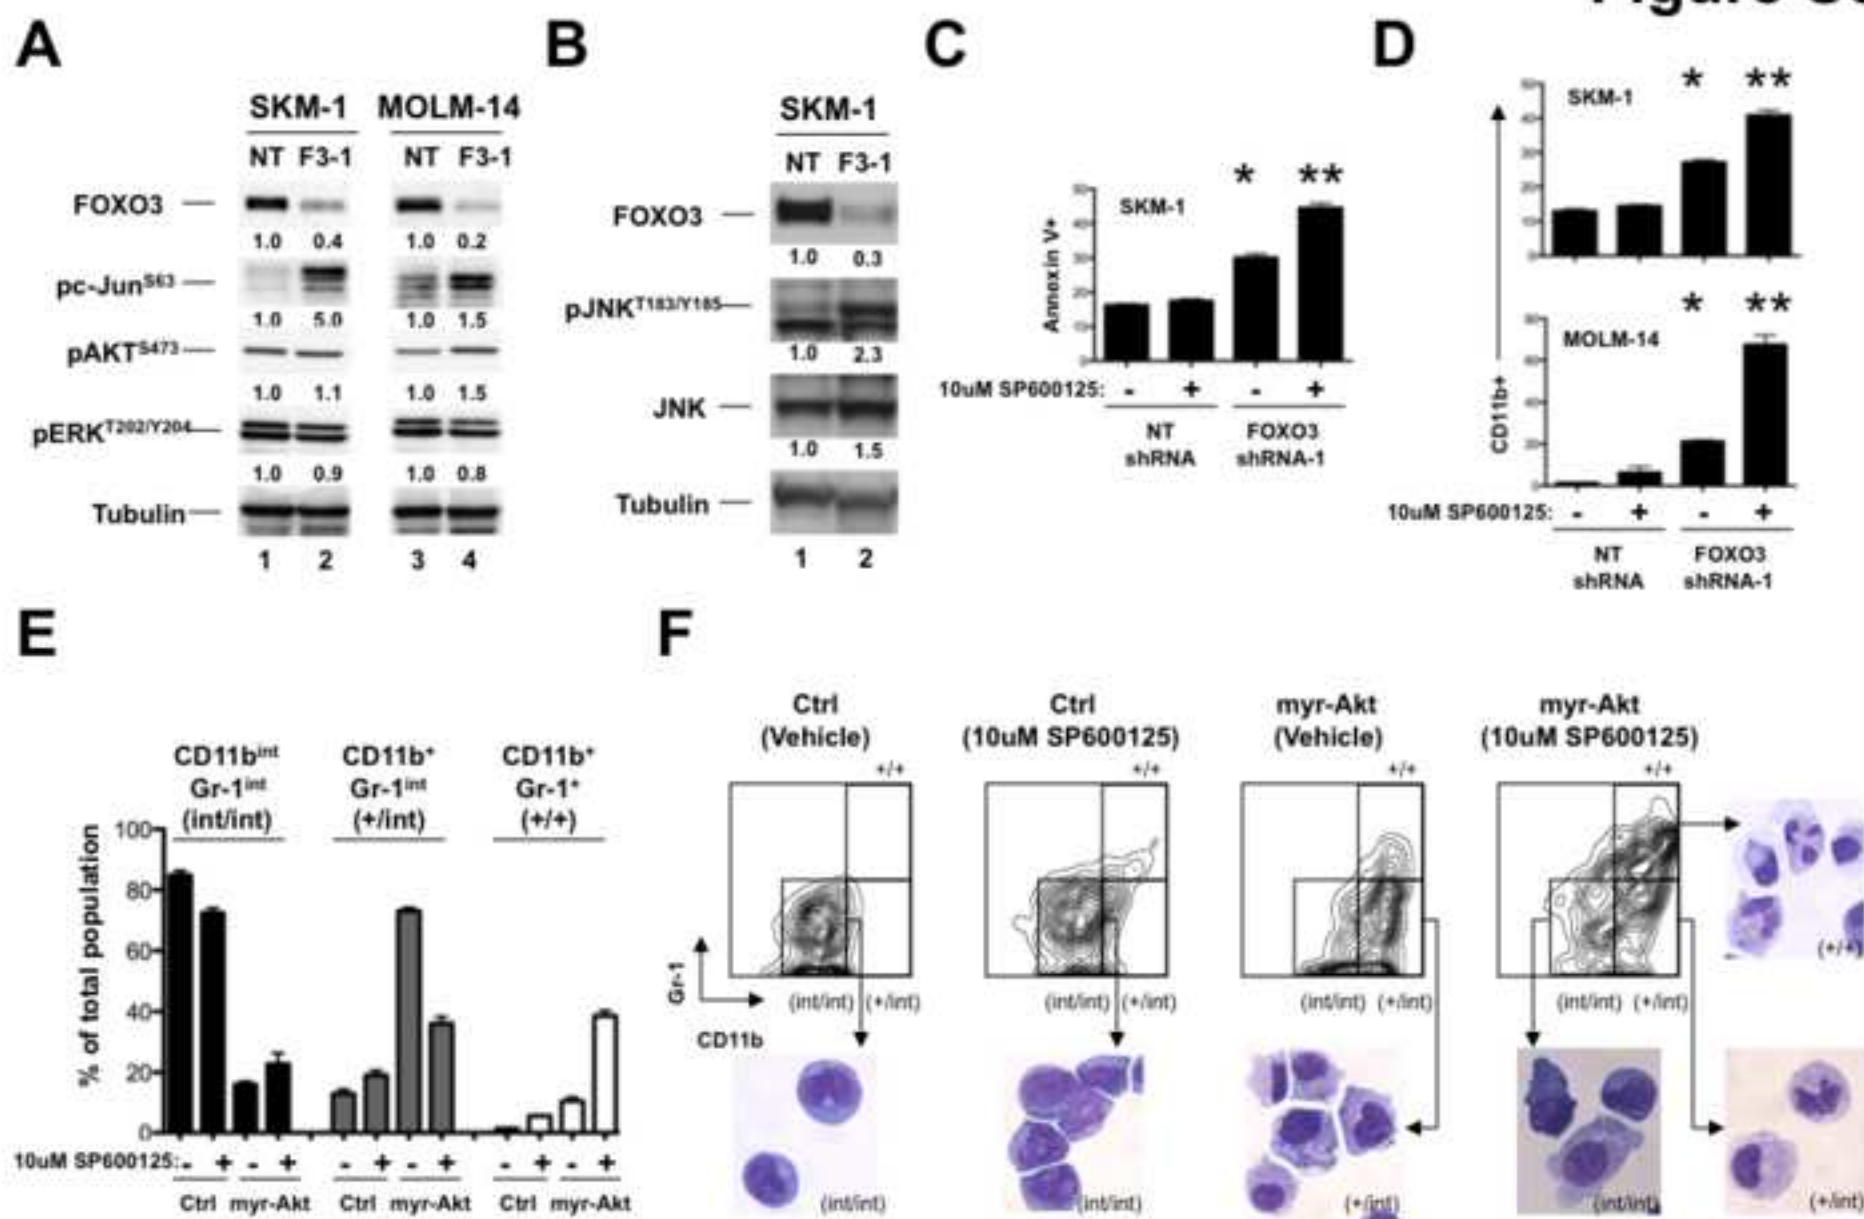

Supplement: NIHMS505131-supplement-02.pdf [file NIHMS505131-supplement-02.pdf]
